# Supplementary material for: Functional analysis of the Candida albicans kinome reveals Hrr25 as a regulator of antifungal susceptibility
Source: PubMed Central journal article supplement — iScience. 2022 May 18;25(6):104432. doi: 10.1016/j.isci.2022.104432 (PMC9160768; doi:10.1016/j.isci.2022.104432), 2022-05-18
Supplement: mmc1.pdf [file mmc1.pdf]

iScience, Volume 25

**Supplemental information**

**Functional analysis of the *Candida albicans*  
kinome reveals Hrr25 as a regulator  
of antifungal susceptibility**

**Yunjin Lee, Sean D. Liston, Dongyeob Lee, Nicole Robbins, and Leah E. Cowen**

**Figure S1. Scatter plots and Pearson correlation values for technical duplicates in the caspofungin (a) and fluconazole (b) susceptibility screens (related to Figure 2).** Each point represents a strain. The correlation coefficient ( $r$ ) for each condition was assessed using GraphPad Prism.

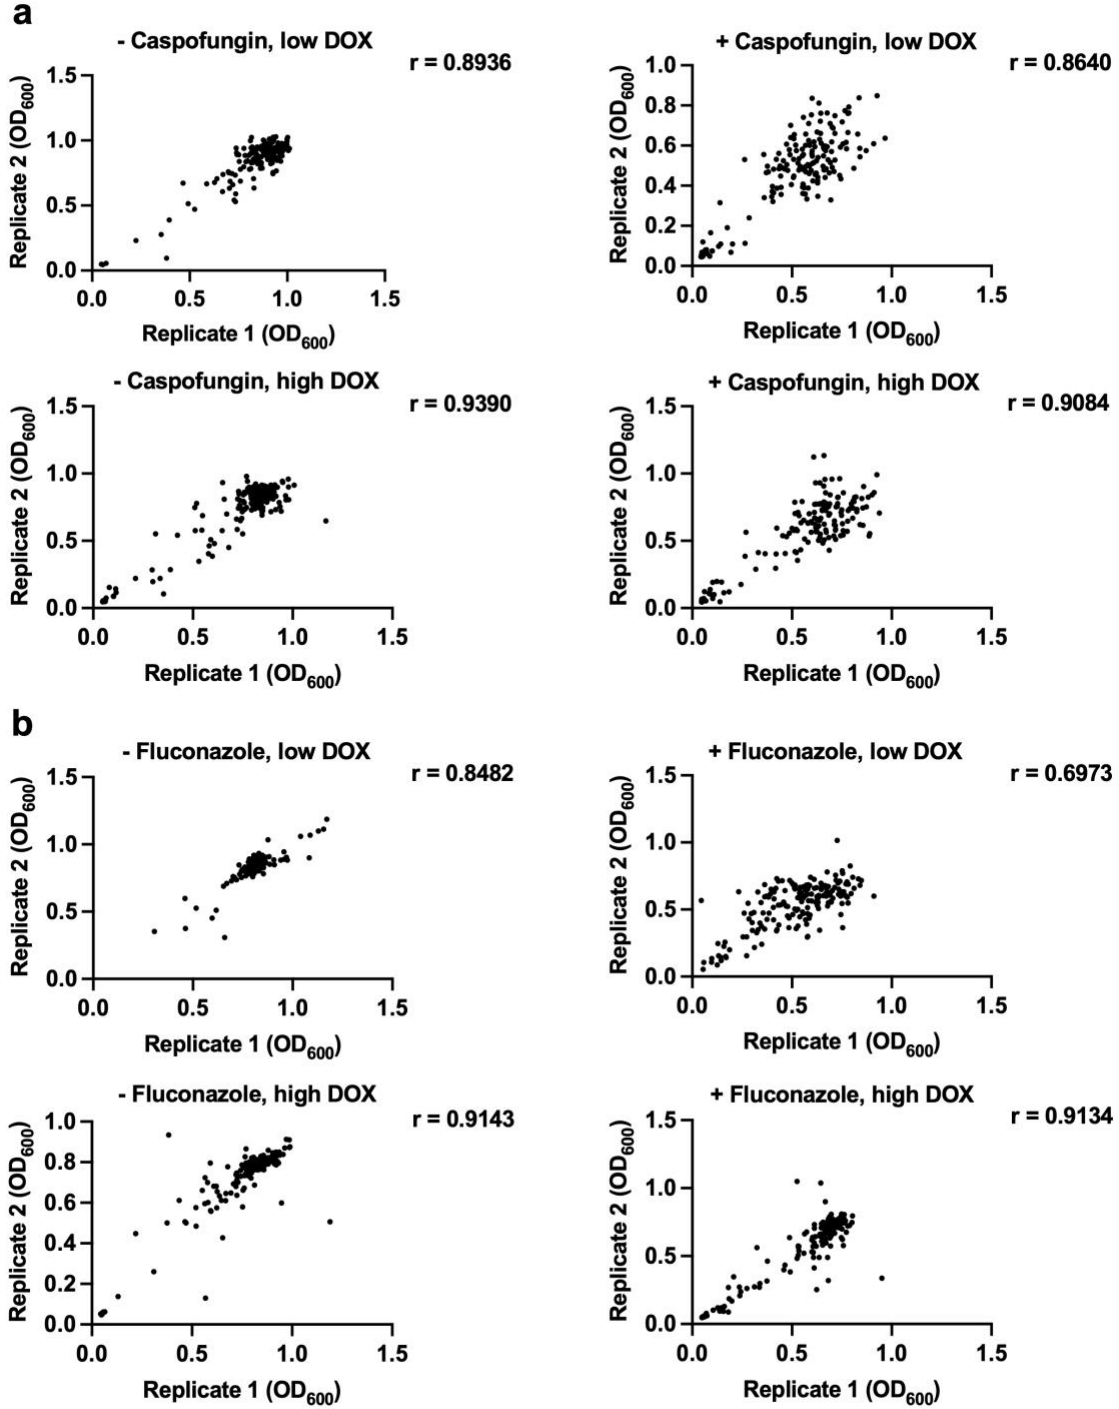

**Figure S2. *HRR25* transcript levels are depleted upon treatment with doxycycline (DOX) (related to Figure 3).** Strains were grown in the absence or presence of DOX (0.5  $\mu\text{g/ml}$  or 5  $\mu\text{g/ml}$ ) overnight, subcultured into fresh medium of the same condition, and grown to mid-log phase. Target gene transcript levels were normalized to *ACT1* and *TEF1*. Data are means  $\pm$  S.E.M for technical triplicates. Expression was compared to the wild-type no-DOX control and significance was determined by 2-way ANOVA (Tukey's test). Asterisks indicate level of significance (\*\*P-value < 0.01, \*\*\*\*P-value < 0.0001). Testing was repeated as an independent biological replicate to confirm results.

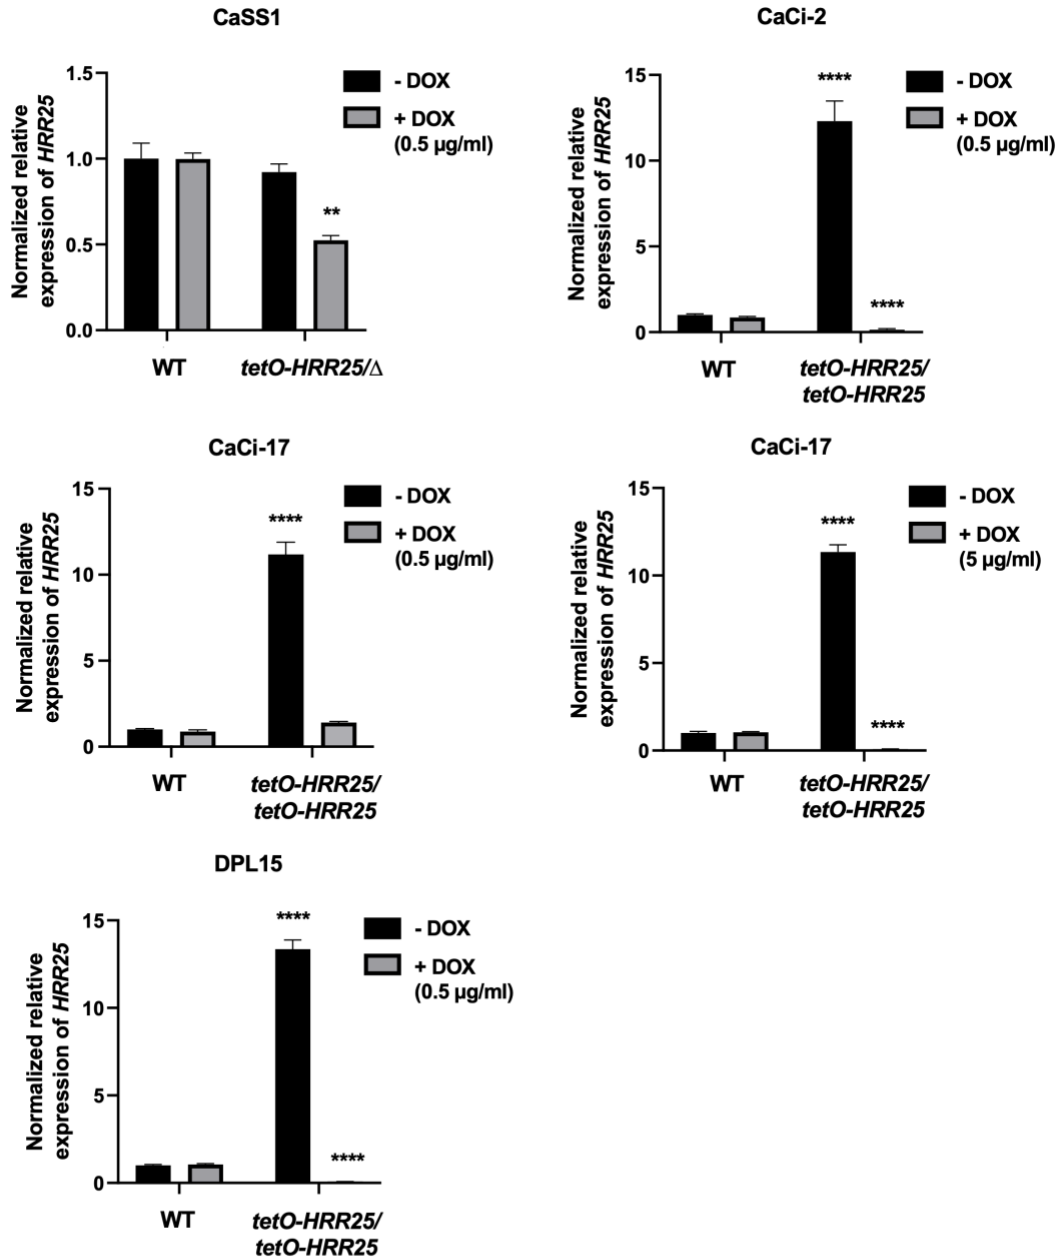

**Figure S3. TAP-tagged version of *C. albicans* Swi6 is functional (related to Figure 4).** Dose-response assays were performed in YPD with a two-fold dilution gradient of caspofungin. Growth ( $OD_{600}$ ) was measured after 24 hours at 30°C. Optical densities were averaged for duplicate measurements and normalized to the no-drug wild-type control. Testing was repeated as an independent biological replicate to confirm results.

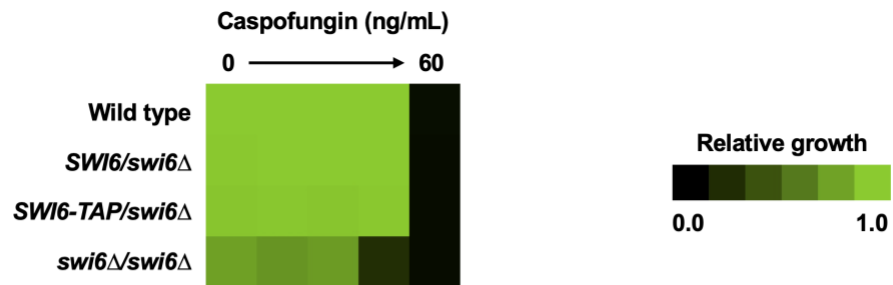

**Table S1. Strains and plasmids used in this study (related to STAR methods).**

| Strain/Plasmid      | Description                                                                                                                                     | Source                    |
|---------------------|-------------------------------------------------------------------------------------------------------------------------------------------------|---------------------------|
| CaLC6106<br>(CaSS1) | <i>ura3::imm434/ura3::imm434 his3::hisG/his3::hisG</i><br><i>leu2::tetRGAL4AD-URA/LEU2</i>                                                      | (Roemer et al., 2003)     |
| CaLC79<br>(CaCi-2)  | Clinical isolate                                                                                                                                | (White, 1997)             |
| CaLC91<br>(CaCi-17) | Clinical isolate                                                                                                                                | (White, 1997)             |
| CaLC990<br>(DPL15)  | Clinical isolate, <i>FKS1<sup>T1922C</sup>/FKS1<sup>T1922C</sup></i>                                                                            | (Park et al., 2005)       |
| CaLC7462            | <i>TAR-tetO-HRR25::NAT/TAR-tetO-HRR25::NAT</i>                                                                                                  | This study                |
| CaLC8121            | <i>TAR- tetO-HRR25/TAR- tetO-HRR25</i>                                                                                                          | This study                |
| CaLC8125            | <i>FKS1<sup>T1922C</sup>/FKS1<sup>T1922C</sup> TAR- tetO-HRR25/TAR- tetO-HRR25</i>                                                              | This study                |
| CaLC1588            | <i>ura3::limm434/ura3 ::limm434 arg4::hisG/arg4::hisG</i><br><i>his1::hisG/his1::hisG swi4::hisG/swi4::ARG4</i><br><i>swi6::URA3/swi6::HIS1</i> | (Hussein et al., 2011)    |
| CaLC1594<br>(CB420) | <i>ura3::limm434/ura3 ::limm434 arg4::hisG/arg4::hisG</i><br><i>his1::hisG/his1::hisG (HIS+ URA3+ARG4+)</i>                                     | (Hussein et al., 2011)    |
| CaLC239<br>(SN95)   | <i>arg4/arg4 his1/his1 URA3/ura3::imm434</i><br><i>IRO1/iro1::imm434</i>                                                                        | (Noble and Johnson, 2005) |

|          |                                                                                                                                         |                                         |
|----------|-----------------------------------------------------------------------------------------------------------------------------------------|-----------------------------------------|
| CaLC3393 | <i>arg4 /arg4 his1 /his1 URA3/ura3::imm434 IRO1/iro1::imm434</i><br><i>SWI6/SWI6-TAP-ARG4</i>                                           | (Xie et al., 2017)                      |
| CaLC8115 | <i>arg4/arg4 his1/his1 URA3/ura3::imm434</i><br><i>IRO1/iro1::imm434 HRR25-6his3Flag-SAT1/HRR25-6his3Flag-SAT1</i>                      | This study                              |
| CaLC7471 | <i>arg4 /arg4 his1 /his1 URA3/ura3::imm434 IRO1/iro1::imm434</i><br><i>HRR25-6his3Flag-SAT1/HRR25-6his3Flag-SAT1 SWI6/SWI6-TAP-ARG4</i> | This study                              |
| CaLC3786 | <i>arg4/arg4 his1/his1 URA3/ura3::imm434 IRO1/iro1::imm434</i><br><i>hsp90::FRT CaTAR-FRT::TetO-HSP90, HSF1/HSF1-TAP-ARG4</i>           | (Veri et al., 2018)                     |
| pLC1041  | pV1393 with sgRNA targeting Ca <i>HRR25</i> promoter, amp <sup>R</sup> nat <sup>R</sup>                                                 | (Caplan et al., 2020)                   |
| pLC1081  | <i>C. albicans</i> CAS9 vector pV1093                                                                                                   | (Liu and Myers, 2017; Min et al., 2016) |

**Table S2. Primers used in this study (related to STAR methods).**

| Primer ID | Sequence (5' to 3')                                                                                     |
|-----------|---------------------------------------------------------------------------------------------------------|
| oLC1988   | CCTCCAATTCGTCAAGAAGG                                                                                    |
| oLC1989   | CCGATCTTGTAACATCTTGC                                                                                    |
| oLC2285   | GACCTTGAGATACCCAATTG                                                                                    |
| oLC2286   | CAGCTTGAATGGAAACGTAG                                                                                    |
| oLC4714   | TCGTTTCTGATGGGCTTTTC                                                                                    |
| oLC5850   | TTCTTTTGGTTTTTTTTTTTTTTTTTTGTCGTTTGCTTTAAGGAAACAGCTATGACCATG                                            |
| oLC5851   | TACGACCAATACGGTATTTCTTACCAACTCTTAAATCCATCGACTATTTATATTTGTATG                                            |
| oLC5852   | GGGACAATTCAAGTCAAGTC                                                                                    |
| oLC5853   | GGCTTCATATTCCAATTGTGG                                                                                   |
| oLC6141   | GAGTGGTGGTGTGGTATTC                                                                                     |
| oLC6142   | CACGATGAATAAAACATCTGGC                                                                                  |
| oLC6926   | AAGAAAGAAAGAAAACCAGGAGTGAA                                                                              |
| oLC6927   | ACAAATATTTAAACTCGGGACCTGG                                                                               |
| oLC6928   | GCGGCCGCAAGTGATTAGACT                                                                                   |
| oLC6929   | GCAGCTCAGTGATTAAGAGTAAAGATGG                                                                            |
| oLC6942   | CTAATTAACGTGTGTGTATGGATC                                                                                |
| oLC8270   | AGAATCAAAGCCTGAAGAGTCAAATCTGAACAATCATAAAAATTGAAAACAGTTCAAC<br>AACTTTATATAATATATTAATGcctgatgaattcgagctcg |

|         |                                                                                                         |
|---------|---------------------------------------------------------------------------------------------------------|
| oLC9125 | TCAACTGAATCAAATTATAGTGGCACTAAATCTGCTCAACCACAAGCCCAACAACCTC<br>CtCAACAAGGcAATCCtGCATGGCTTggtcgacggatcccc |
| oLC9126 | CCACAACAAGGTAATCCAGCCAAATTAATAATAGTTTACGCAAGTC                                                          |
| oLC9127 | GCTGGATTACCTTGTTGTGGGTTTTAGAGCTAGAAATAGCAAGTTAAA                                                        |
| oLC9129 | ATCTTTACCATGGCAAGGATTGAAAGCC                                                                            |
| oLC9130 | GAAGATGGTGAACCAATTCAAAATGGTGC                                                                           |
